# Supplementary material for: Author Correction: The Cannabinoid Content of Legal Cannabis in Washington State Varies Systematically Across Testing Facilities and Popular Consumer Products
Source: PubMed Central journal article supplement (PMC7506002; doi:10.1038/s41598-020-69680-x), 2020-08-27

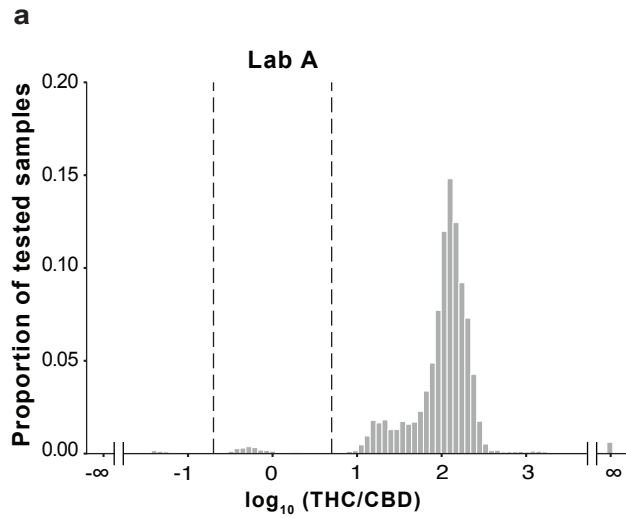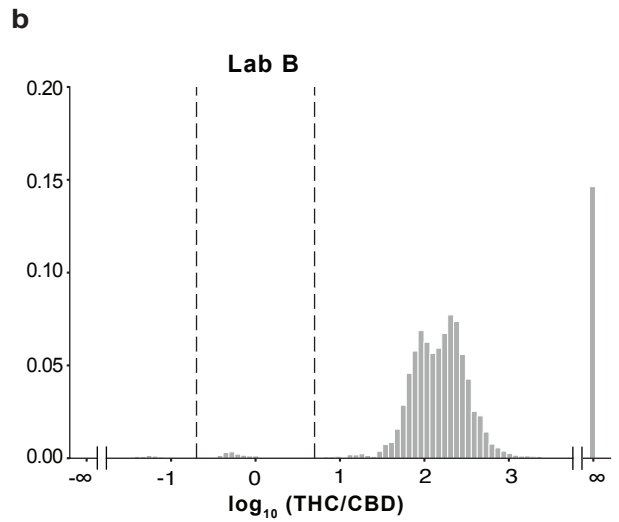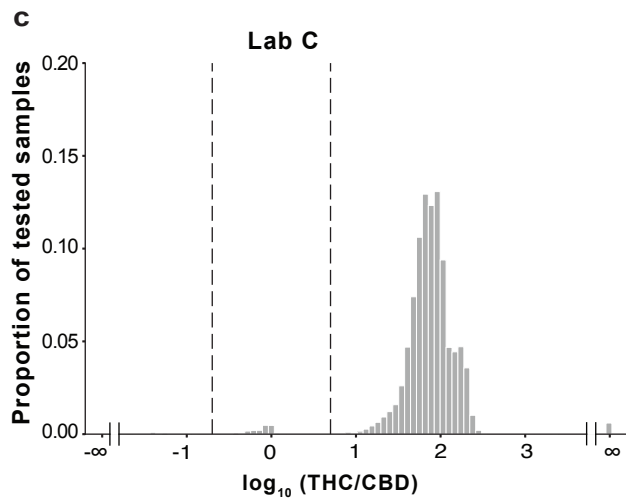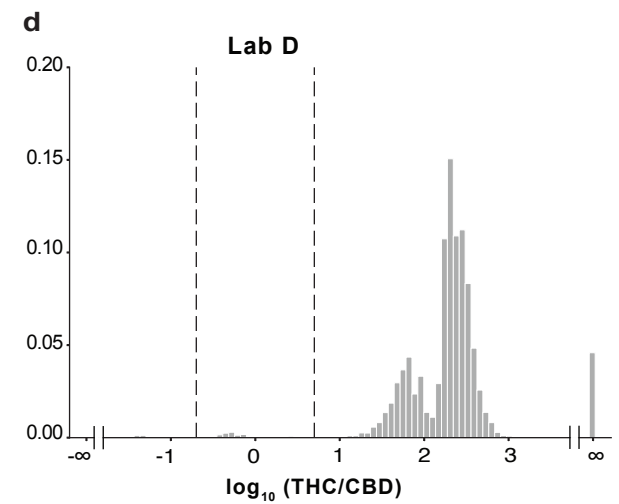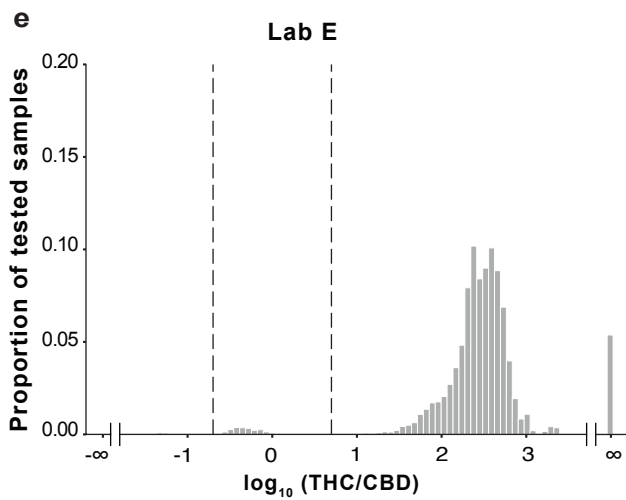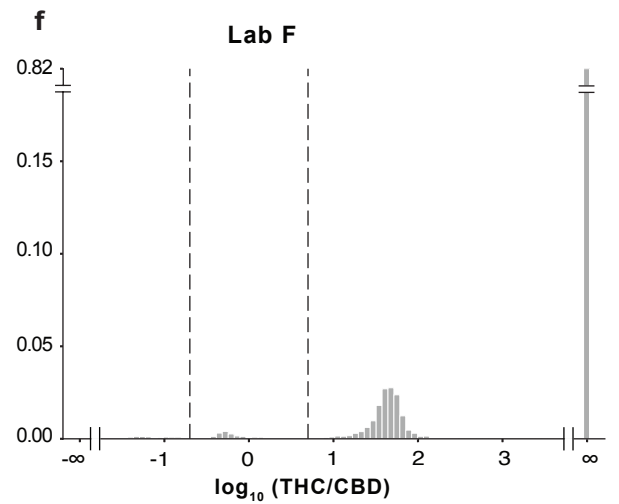

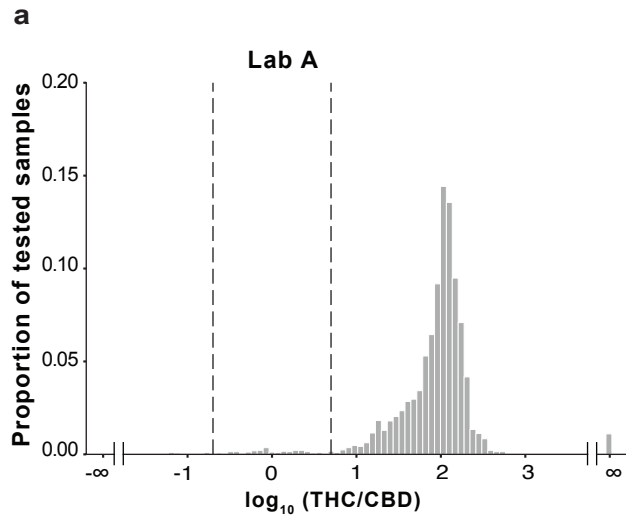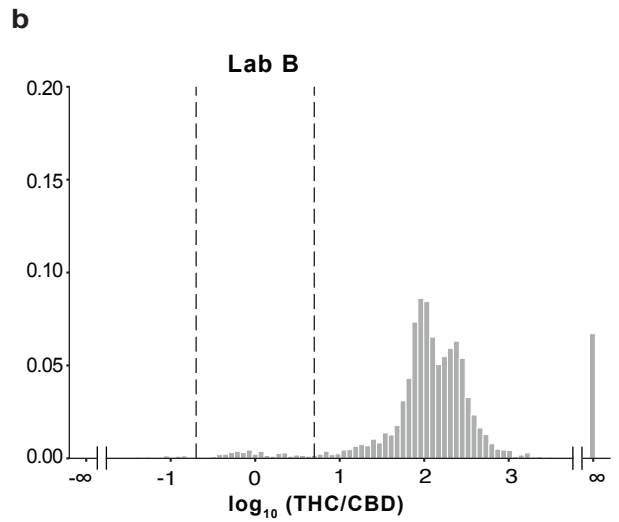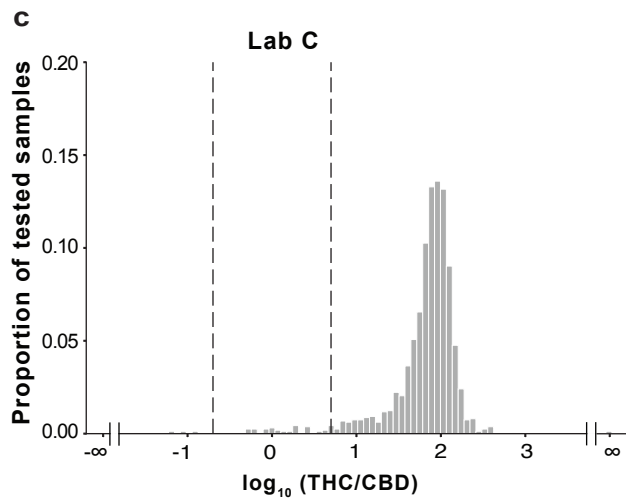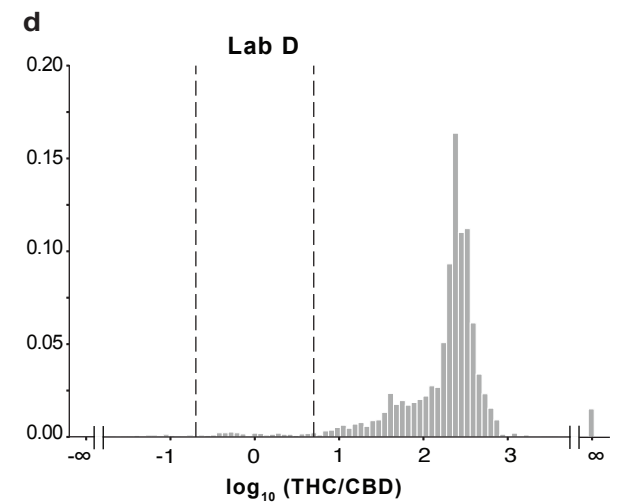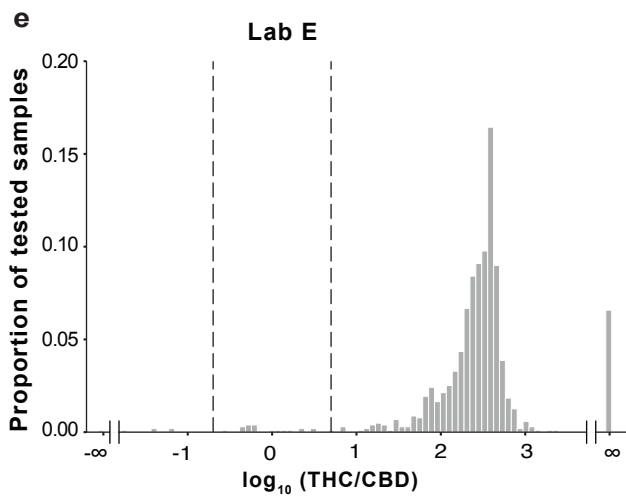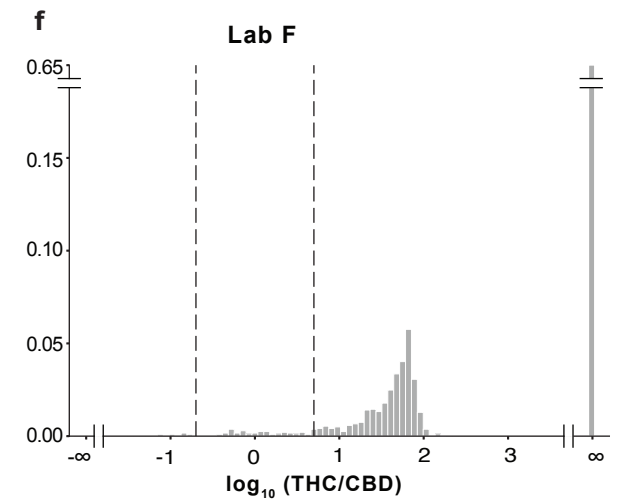

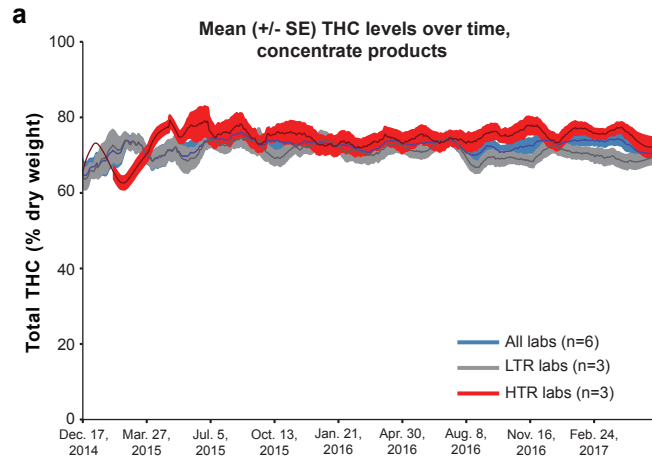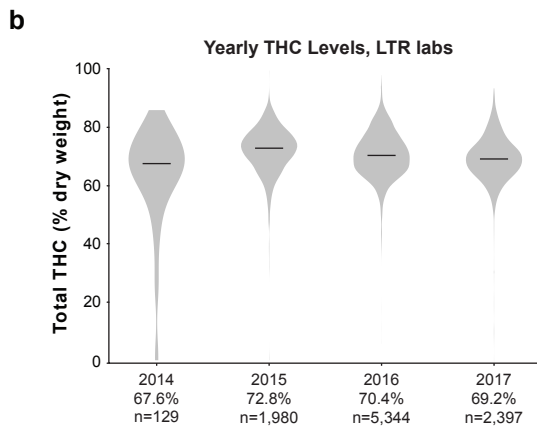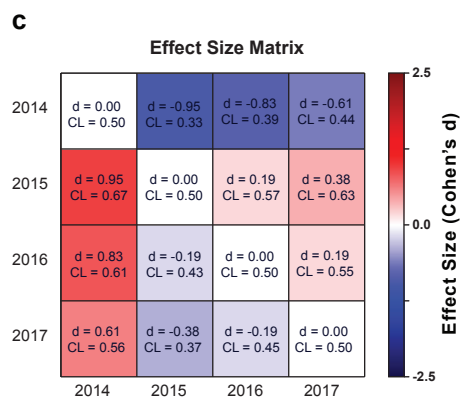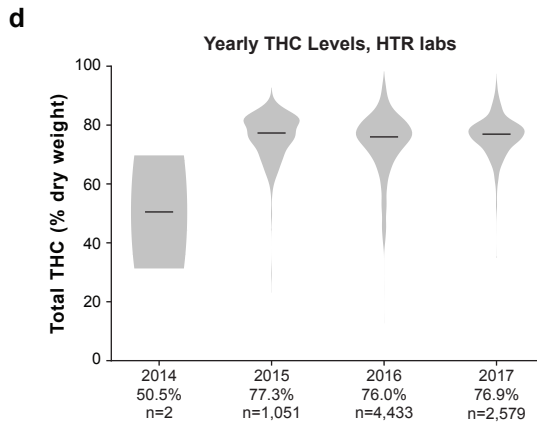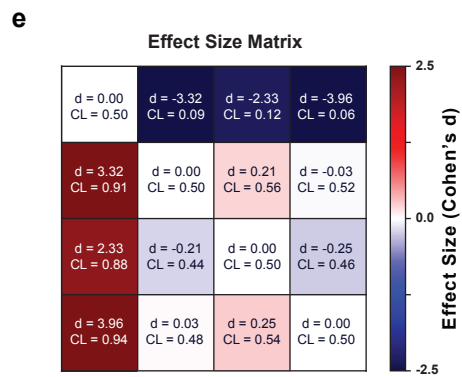

Supplement: 41598_2020_69680_MOESM1_ESM.pdf [file 41598_2020_69680_MOESM1_ESM.pdf]
